# Supplementary material
Source: bioRxiv or medRxiv preprint supplement (https://www.biorxiv.org/highwire/filestream/108689/field_highwire_adjunct_files/0/331330-1.pdf)

## SUPPLEMENTARY DATA

### Figure S1

Simulated dendrogram of four samples. A. Simulated dendrogram tree with four samples and 10 subgroups for each sample. B-C. ClusterMap tree cut results for the simulated tree at edge cutoffs of 0.1 and 0.2. D. Diagram of the separability calculation.

### Figure S2

A-B. Feature plot for identifying cell types. The known markers for basal cells are Krt14, Acta2, Myl9, Sparc, Mylk, and Cxcl14. Luminal cells express Elf5, Prlr, Areg, Ly6d, Stc2, Krt19, and mature luminal express Pgr, Prlr, Cited1, Esrrb, and Cxcl15 (15). C-D. Gene ontology and pathway analysis for new marker genes of groups in combined samples (Figure 4C) using Metascape. C. luminal progenitors groups 1 and 11. D. Basal groups 3 and 7.

### Figure S3

A. Pre-analysis for immune stimulated datasets. B. Circos plot of matched sub groups. C-D. Feature plot for identifying cell types.

### Figure S4

Analysis for PBMC replicates. A. Pre-analysis of PBMC 4K. B. Pre-analysis of PBMC 8K. C. Heat map of marker genes. D. ClusterMap results. E-F. Feature plots to identify cell types.

### Figure S5

CCA analysis and clustering for epithelial cell datasets as in Figure3, 4. A. t-SNE plot of clustered cells. B. t-SNE plot with cells colored by sample. C. Feature plot for identifying cell types. D. t-SNE plot of CCA analysis. Cells of group 2 in estrus, defined as in Figure 4B are highlighted in green.

Figure S1

A

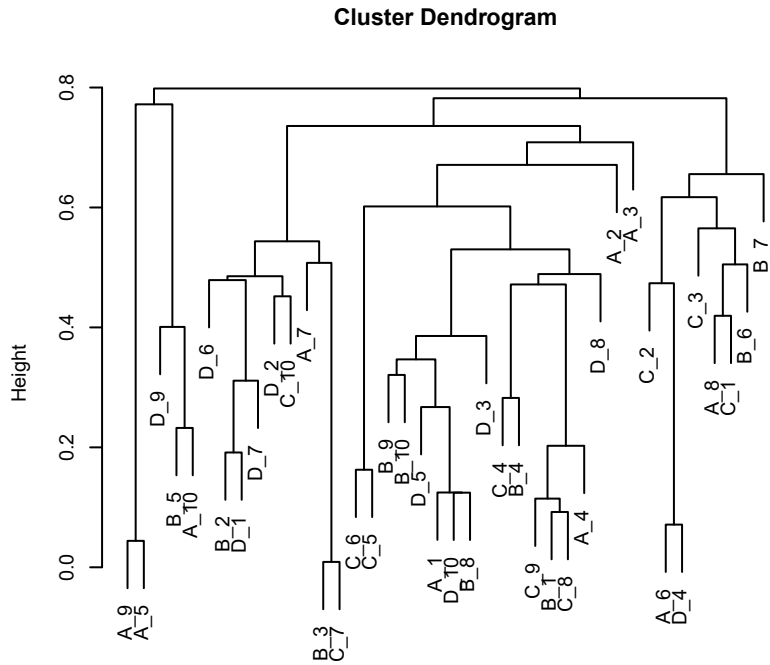

B

edge\_cutoff = 0.1

|    | A       | B        | C       | D    | similarity | regroup |
|----|---------|----------|---------|------|------------|---------|
| 1  | NA      | B_3      | C_7     | NA   | 0.99       | 1       |
| 2  | A_9;A_5 | NA       | NA      | NA   | 0.96       | 2       |
| 3  | A_6     | NA       | NA      | D_4  | 0.93       | 3       |
| 4  | A_1     | B_8      | NA      | D_10 | 0.88       | 4       |
| 5  | NA      | NA       | C_6;C_5 | NA   | 0.84       | 5       |
| 6  | NA      | B_2      | NA      | D_1  | 0.81       | 6       |
| 7  | A_4     | B_1      | C_9;C_8 | NA   | 0.8        | 7       |
| 8  | A_10    | B_5      | NA      | NA   | 0.77       | 8       |
| 9  | NA      | B_4      | C_4     | NA   | 0.72       | 9       |
| 10 | NA      | B_9;B_10 | NA      | NA   | 0.68       | 10      |
| 11 | NA      | NA       | C_10    | D_2  | 0.55       | 11      |
| 12 | A_8     | B_6      | C_3;C_1 | NA   | 0.43       | 12      |
| 13 | NA      | NA       | NA      | D_9  | NA         | 13      |
| 14 | NA      | NA       | NA      | D_6  | NA         | 14      |
| 15 | NA      | NA       | NA      | D_7  | NA         | 15      |
| 16 | A_7     | NA       | NA      | NA   | NA         | 16      |
| 17 | NA      | NA       | NA      | D_5  | NA         | 17      |
| 18 | NA      | NA       | NA      | D_3  | NA         | 18      |
| 19 | NA      | NA       | NA      | D_8  | NA         | 19      |
| 20 | A_2     | NA       | NA      | NA   | NA         | 20      |
| 21 | A_3     | NA       | NA      | NA   | NA         | 21      |
| 22 | NA      | NA       | C_2     | NA   | NA         | 22      |
| 23 | NA      | B_7      | NA      | NA   | NA         | 23      |

C

edge\_cutoff = 0.2

|    | A       | B            | C       | D               | similarity | regroup |
|----|---------|--------------|---------|-----------------|------------|---------|
| 1  | NA      | B_3          | C_7     | NA              | 0.99       | 1       |
| 2  | A_9;A_5 | NA           | NA      | NA              | 0.96       | 2       |
| 3  | A_6     | NA           | NA      | D_4             | 0.93       | 3       |
| 4  | NA      | NA           | C_6;C_5 | NA              | 0.84       | 4       |
| 5  | A_4     | B_1          | C_9;C_8 | NA              | 0.8        | 5       |
| 6  | NA      | B_4          | C_4     | NA              | 0.72       | 6       |
| 7  | A_1     | B_9;B_10;B_8 | NA      | D_5;D_10;D_3    | 0.61       | 7       |
| 8  | A_10    | B_5          | NA      | D_9             | 0.6        | 8       |
| 9  | NA      | B_2          | C_10    | D_6;D_1;D_7;D_2 | 0.51       | 9       |
| 10 | A_8     | B_6          | C_3;C_1 | NA              | 0.43       | 10      |
| 11 | A_7     | NA           | NA      | NA              | NA         | 11      |
| 12 | NA      | NA           | NA      | D_8             | NA         | 12      |
| 13 | A_2     | NA           | NA      | NA              | NA         | 13      |
| 14 | A_3     | NA           | NA      | NA              | NA         | 14      |
| 15 | NA      | NA           | C_2     | NA              | NA         | 15      |
| 16 | NA      | B_7          | NA      | NA              | NA         | 16      |

D

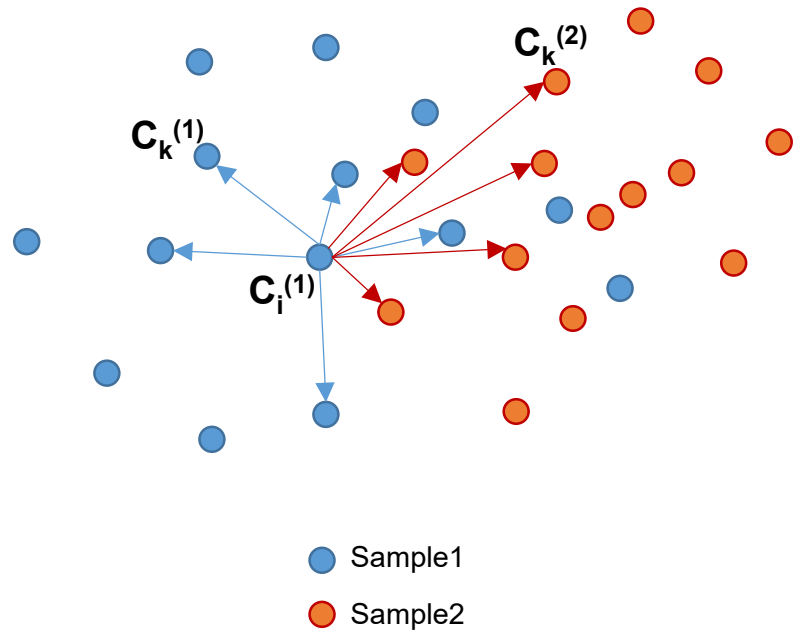

Figure S2

A

Diestrus (p7d)

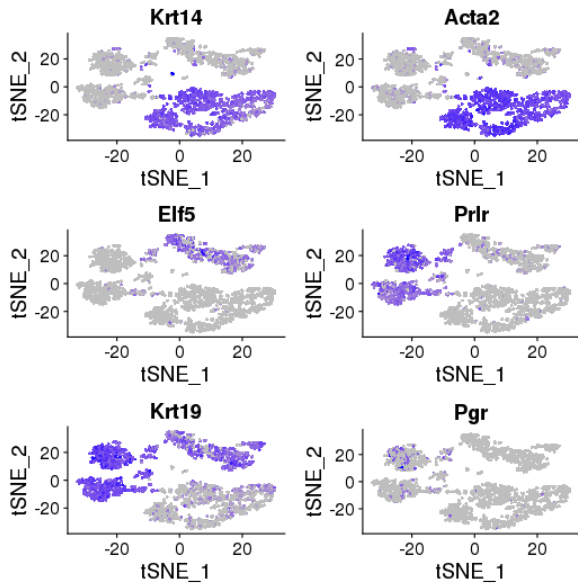

B

Estrus (p7e)

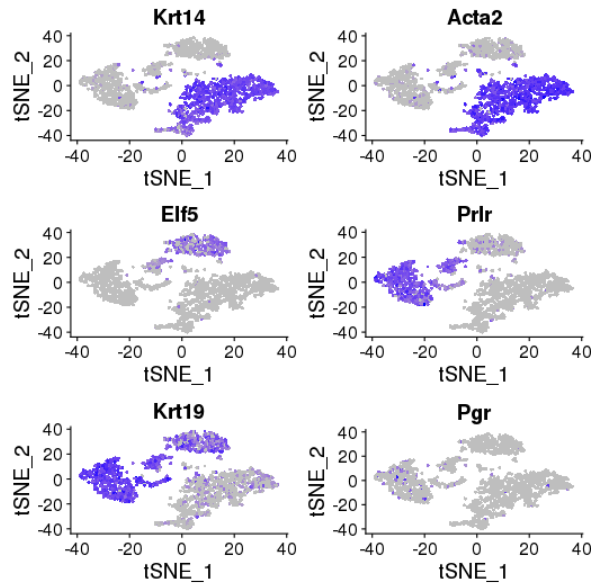

C

luminal progenitors Group1

luminal progenitors Group11, diestrus only

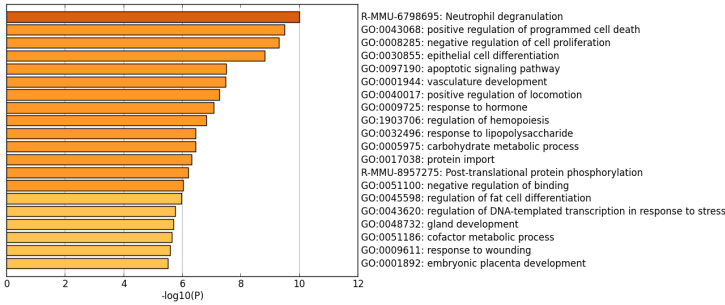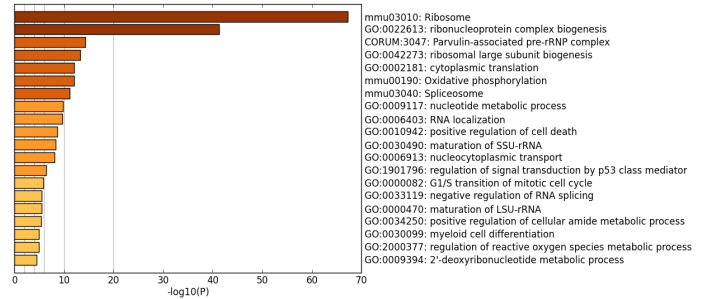

D

Basal Group 3, estrus enriched

Basal Group 7, diestrus

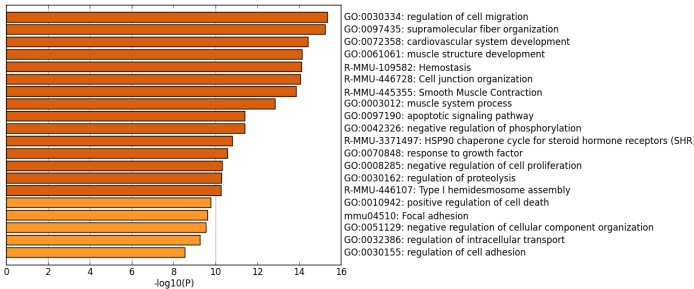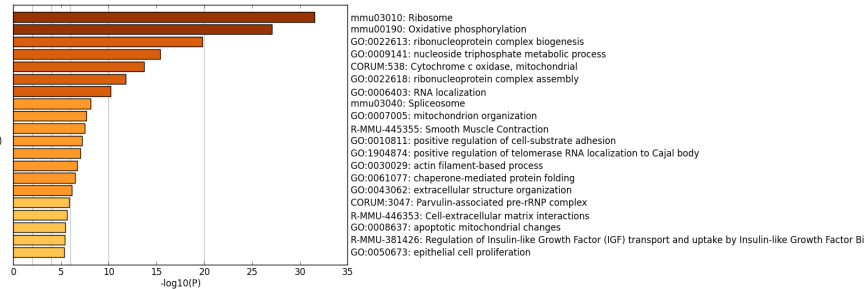

Figure S3

A

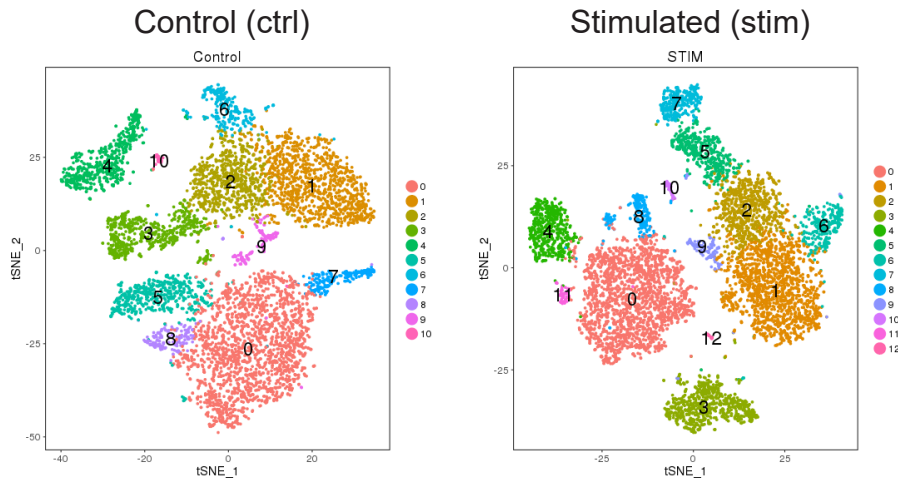

B

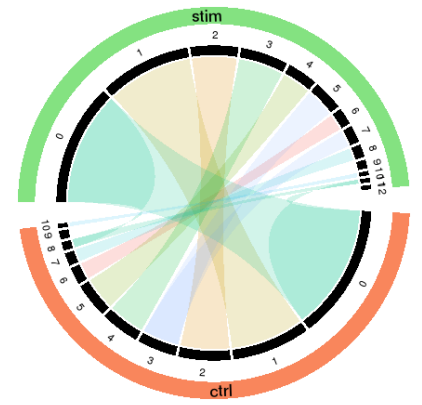

C

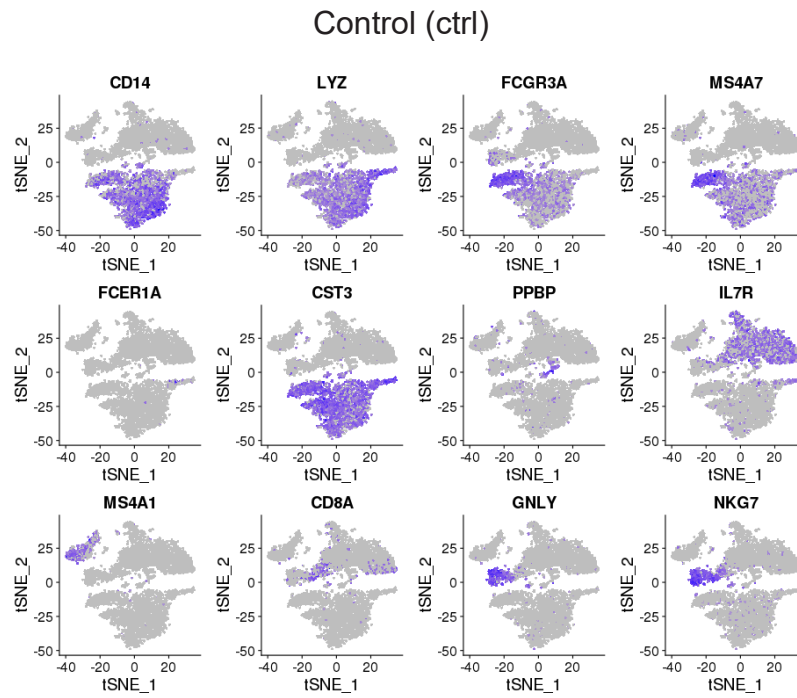

D

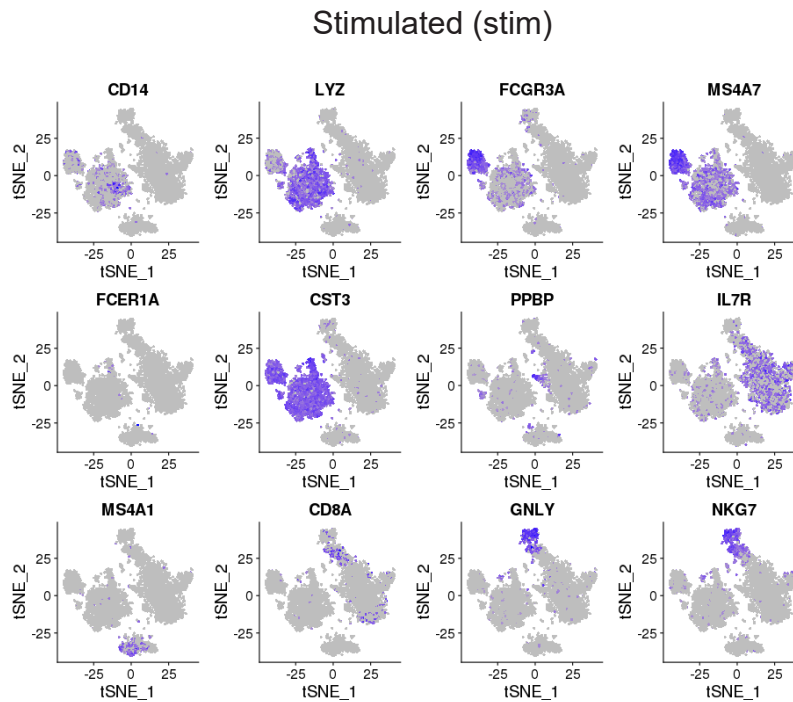

Figure S4

A

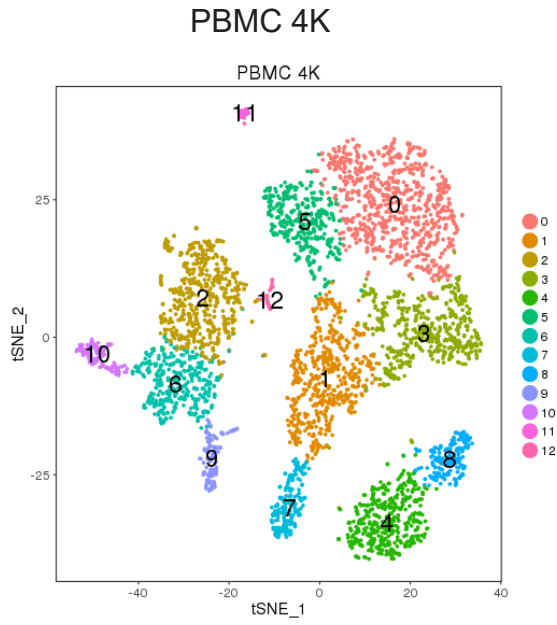

B

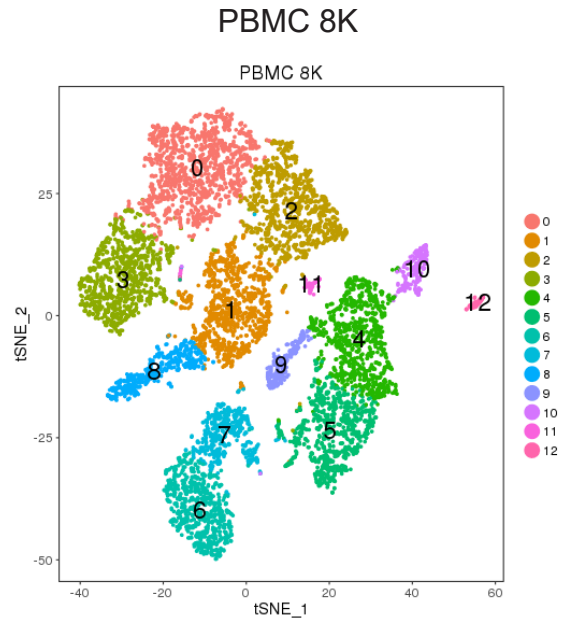

C

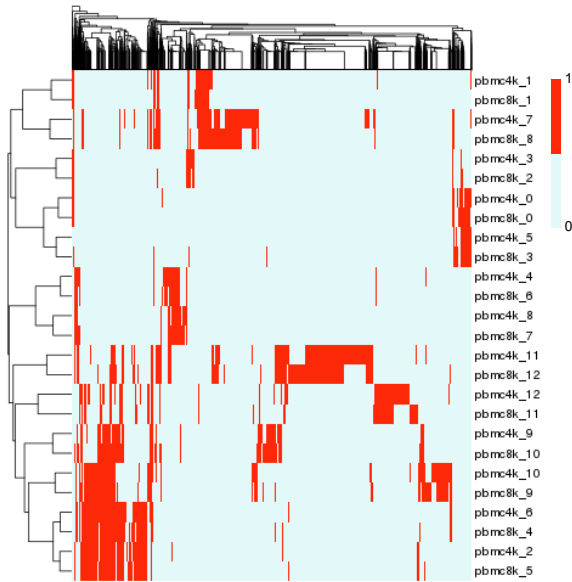

D

|    | pbmc4k    | pbmc8k    | similarity | regroup | pbmc4k_cell_perc | pbmc8k_cell_perc | pbmc4k.vs.pbmc8k_separability |
|----|-----------|-----------|------------|---------|------------------|------------------|-------------------------------|
| 1  | pbmc4k_4  | pbmc8k_6  | 0.83       | 1       | 0.1              | 0.09             | -0.09                         |
| 2  | pbmc4k_6  | pbmc8k_4  | 0.82       | 2       | 0.08             | 0.11             | 0.03                          |
| 3  | pbmc4k_2  | pbmc8k_5  | 0.82       | 3       | 0.13             | 0.1              | -0.01                         |
| 4  | pbmc4k_0  | pbmc8k_0  | 0.79       | 4       | 0.19             | 0.16             | -0.02                         |
| 5  | pbmc4k_3  | pbmc8k_2  | 0.76       | 5       | 0.12             | 0.12             | -0.08                         |
| 6  | pbmc4k_5  | pbmc8k_3  | 0.76       | 6       | 0.09             | 0.12             | -0.07                         |
| 7  | pbmc4k_10 | pbmc8k_9  | 0.74       | 7       | 0.03             | 0.03             | -0.08                         |
| 8  | pbmc4k_9  | pbmc8k_10 | 0.71       | 8       | 0.03             | 0.03             | -0.01                         |
| 9  | pbmc4k_8  | pbmc8k_7  | 0.71       | 9       | 0.04             | 0.06             | 0.05                          |
| 10 | pbmc4k_1  | pbmc8k_1  | 0.68       | 10      | 0.13             | 0.12             | -0.08                         |
| 11 | pbmc4k_7  | pbmc8k_8  | 0.66       | 11      | 0.04             | 0.06             | 0.05                          |
| 12 | pbmc4k_11 | pbmc8k_12 | 0.61       | 12      | 0.01             | 0.01             | -0.08                         |
| 13 | pbmc4k_12 | pbmc8k_11 | 0.48       | 13      | 0.01             | 0.01             | -0.02                         |

E

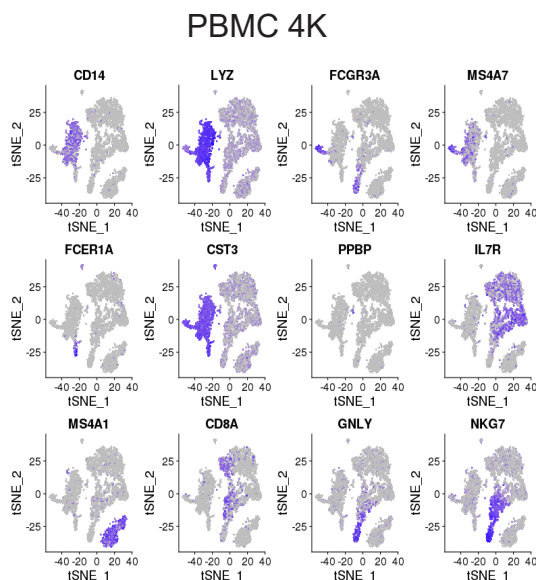

F

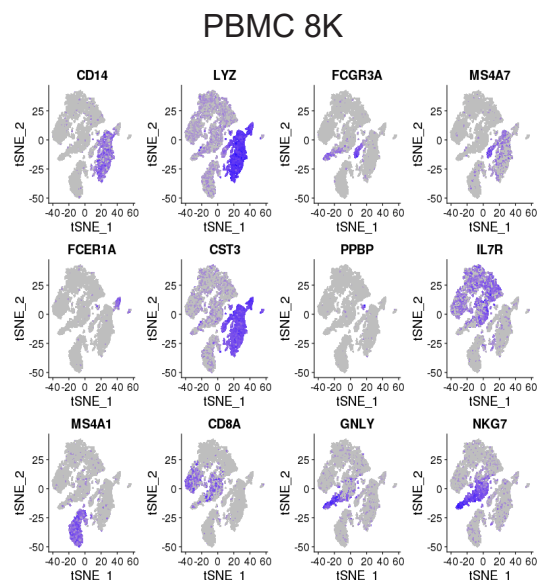

Figure S5

A

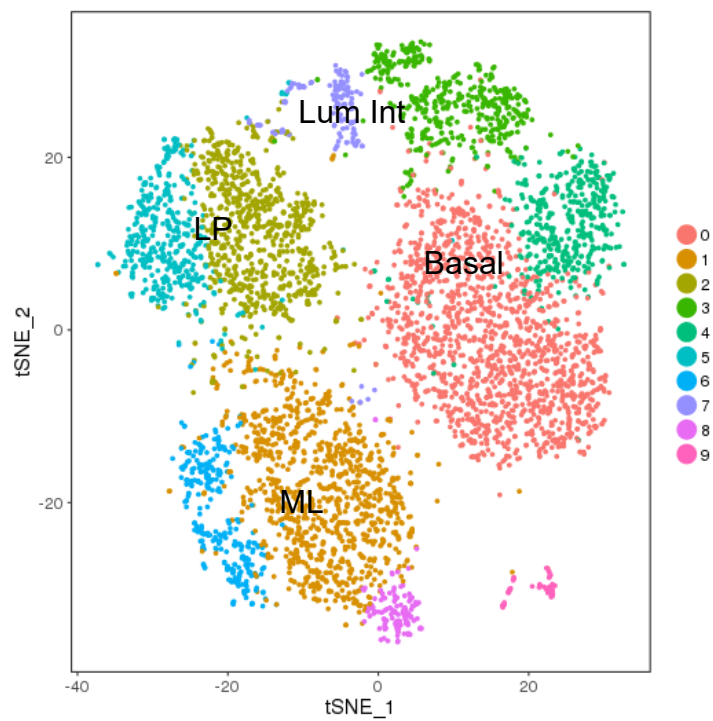

B

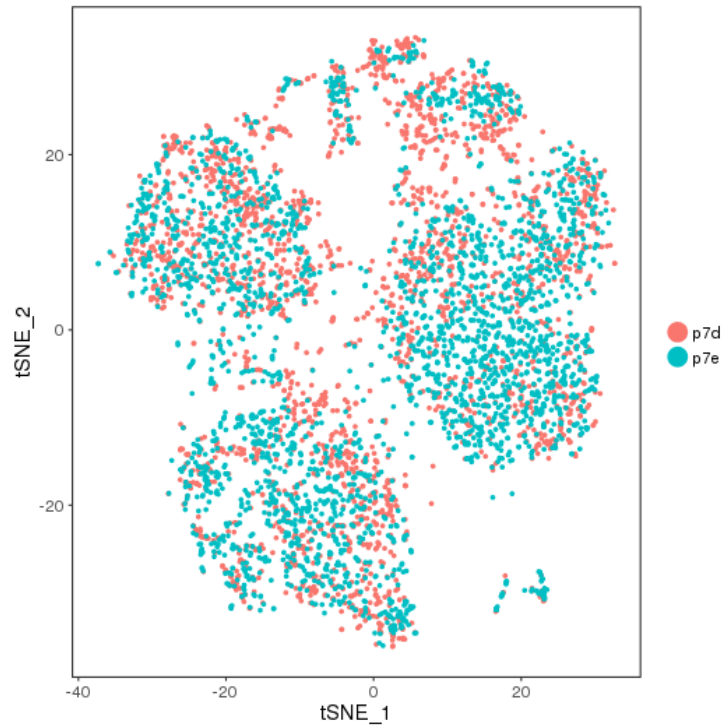

C

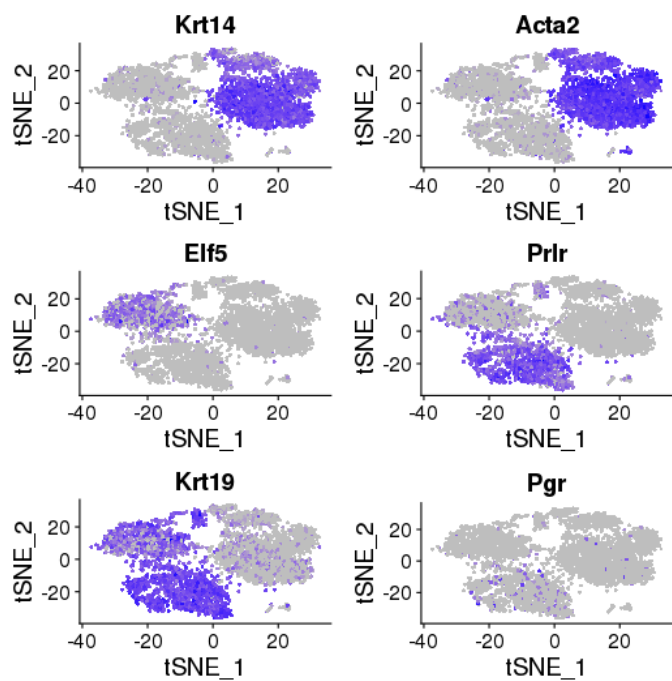

D

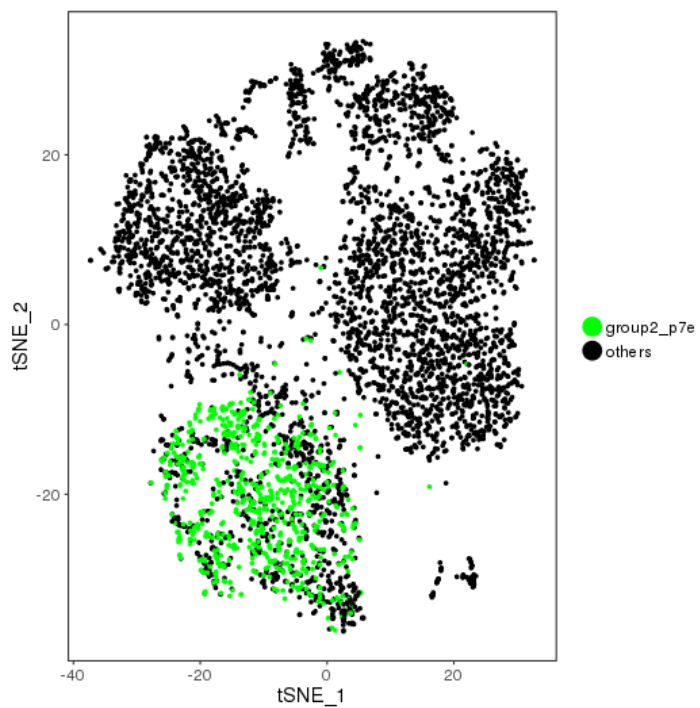

Supplement: Supplementary file [file 331330-1.pdf]
